# Supplementary material for: 3D nanoplasmonic structure for ultrahigh enhanced SERS with less variability, polarization independence, and multimodal sensing applied to picric acid detection
Source: Royal Society of Chemistry journal article supplement (doi:10.1039/d4na00387j), 2024-01-01
Supplement: d4na00387j1.pdf [file d4na00387j1.pdf]

Supplementary File

**3D Nanoplasmonic Structure for Ultrahigh Enhanced SERS with Less Variability, Polarization Independence, and Multimodal Sensing Applied to Picric Acid Detection**

Anand M. Shrivastav<sup>a,b,†</sup>, Mohammad Abutoama<sup>a,c,†</sup>, and Ibrahim Abdulhalim<sup>a,\*</sup>

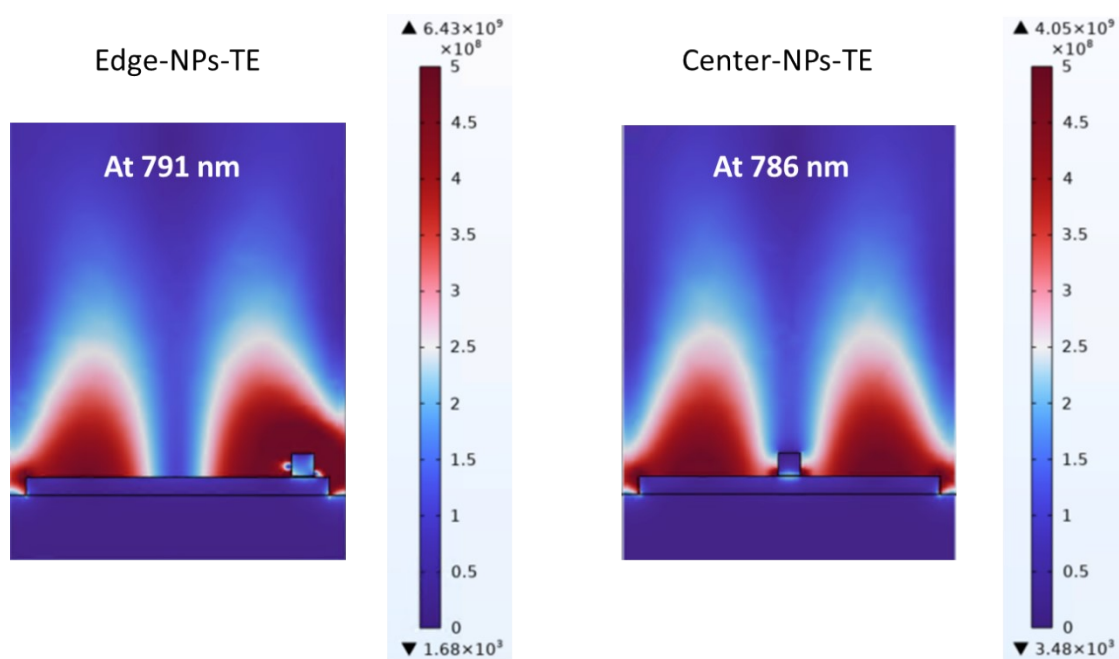

Figure S1: The comparison of electric field calculation for (a) off diagonal and (b) centered Au nanocubes obtained at resonances at 791 nm and 785 nm respectively
